# Supplementary material for: A sensitive gold nanoparticle-based aptasensor for colorimetric detection of Aβ1–40 oligomers
Source: Royal Society of Chemistry journal article supplement (doi:10.1039/c7ay02918g), 2018-01-01
Supplement: c7ay02918g1.pdf [file c7ay02918g1.pdf]

## Supplementary material

### **A sensitive gold nanoparticle-based aptasensor for colorimetric detection of A $\beta$ (1-40) oligomers**

Xu Zhu<sup>a</sup>, Ningning Zhang<sup>b</sup>, Yintang Zhang<sup>a,\*</sup>, Yuanqiang Hao<sup>a</sup>, Baoxia Liu<sup>b</sup>, Zhu  
Chang<sup>b</sup>, Yanli Zhou<sup>b</sup>, Baoxian Ye<sup>b</sup>, Maotian Xu<sup>a,b,\*</sup>

<sup>a</sup> *Henan Key Laboratory of Biomolecular Recognition and Sensing, College of  
Chemistry and Chemical Engineering, Shangqiu Normal University, Shangqiu  
476000 (P. R. China).*

<sup>b</sup> *College of Chemistry and Molecular Engineering, Zhengzhou University, Zhengzhou  
450001, China*

\* Corresponding authors: Fax/Tel.: +86 370 3109178

E-mail addresses: [xumaotian@163.com](mailto:xumaotian@163.com); [ahhh\\_cs@163.com](mailto:ahhh_cs@163.com)

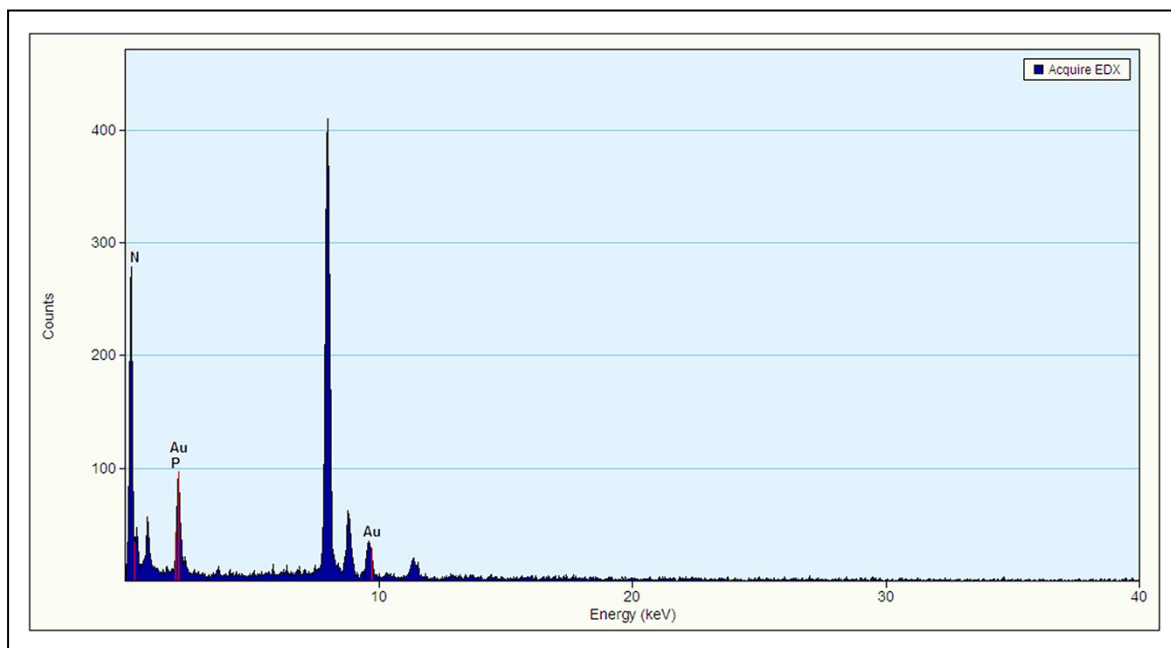

**Fig. S1.** EDX figure of AuNPs with 80  $\mu\text{M}$  Aptamer.

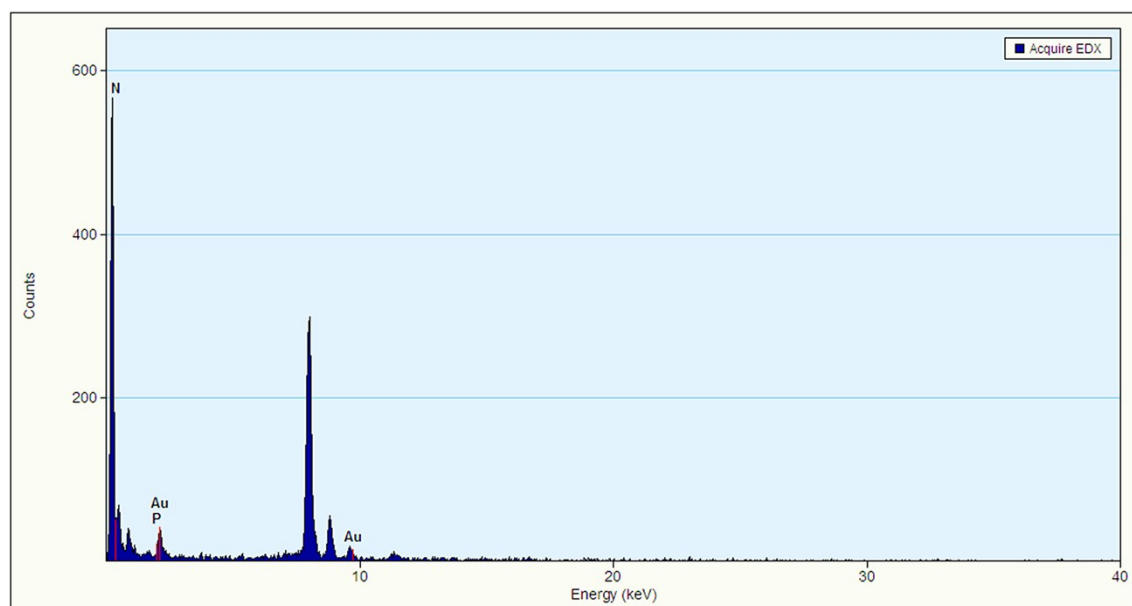

**Fig. S2.** EDX figure of AuNPs with 80  $\mu\text{M}$  Aptamer, 80  $\mu\text{M}$  A $\beta$ O.

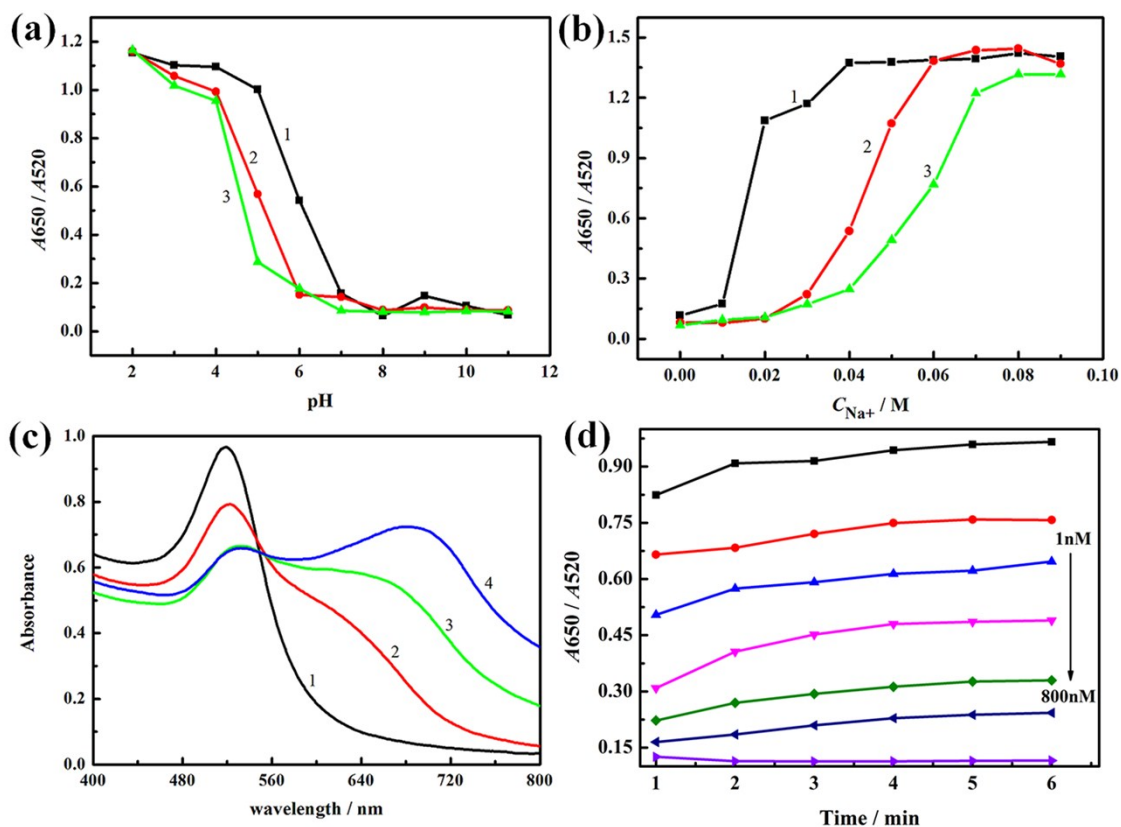

**Fig. S3.** (1) Dependences of absorption ratio on (a) pH and (b) the concentration of  $Na^+$ . The AuNP solution (2) The AuNP solution with the addition of  $80 \mu M$  aptamer (2) The AuNP solution with the addition of  $80 \mu M$  A $\beta O$ ,  $80 \mu M$  aptamer and  $50 mM$   $Na^+$  (c) the order of reagent addition, (1) The AuNP solution (2) AuNP first and then aptamer-A $\beta O$ , finally saline. (3) AuNP first and then aptamer followed by saline, finally A $\beta O$ . (4) AuNP first and then saline, finally aptamer-A $\beta O$ . (d) incubation time on the spectral features of the colorimetric assay.
